# Supplementary material for: Cyclic pentapeptide cRGDfK enhances the inhibitory effect of sunitinib on TGF-β1-induced epithelial-to-mesenchymal transition in human non-small cell lung cancer cells
Source: PubMed Central journal article supplement (PMC7433881; doi:10.1371/journal.pone.0232917), 2020-08-18

Figure 2B

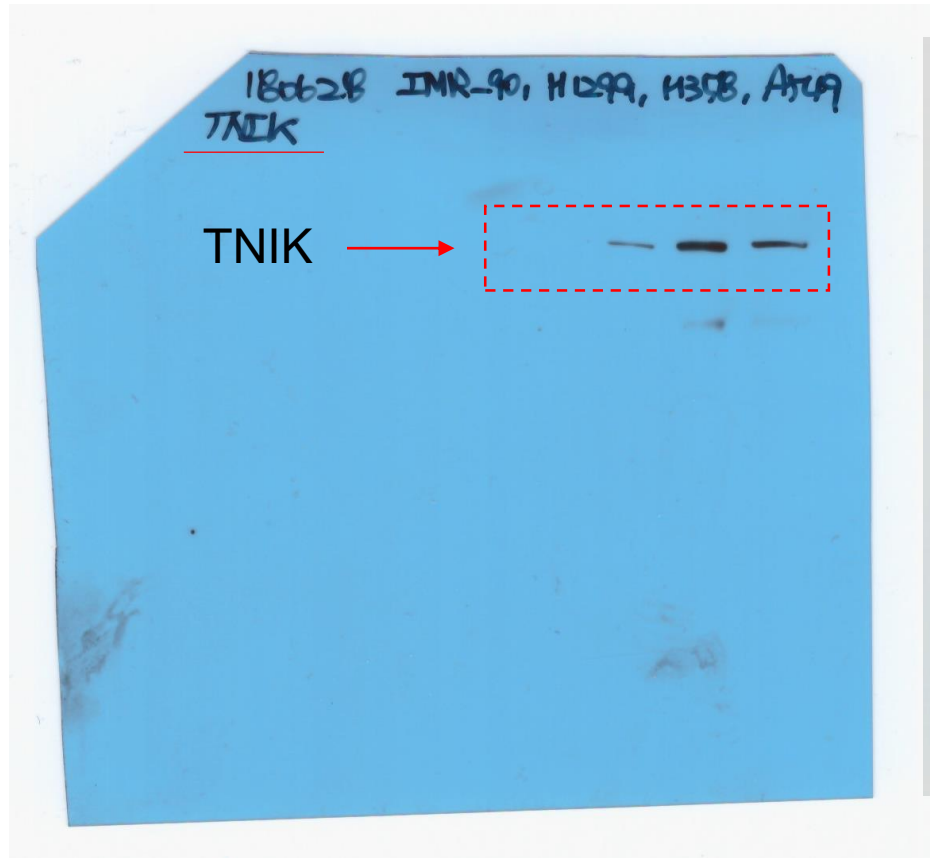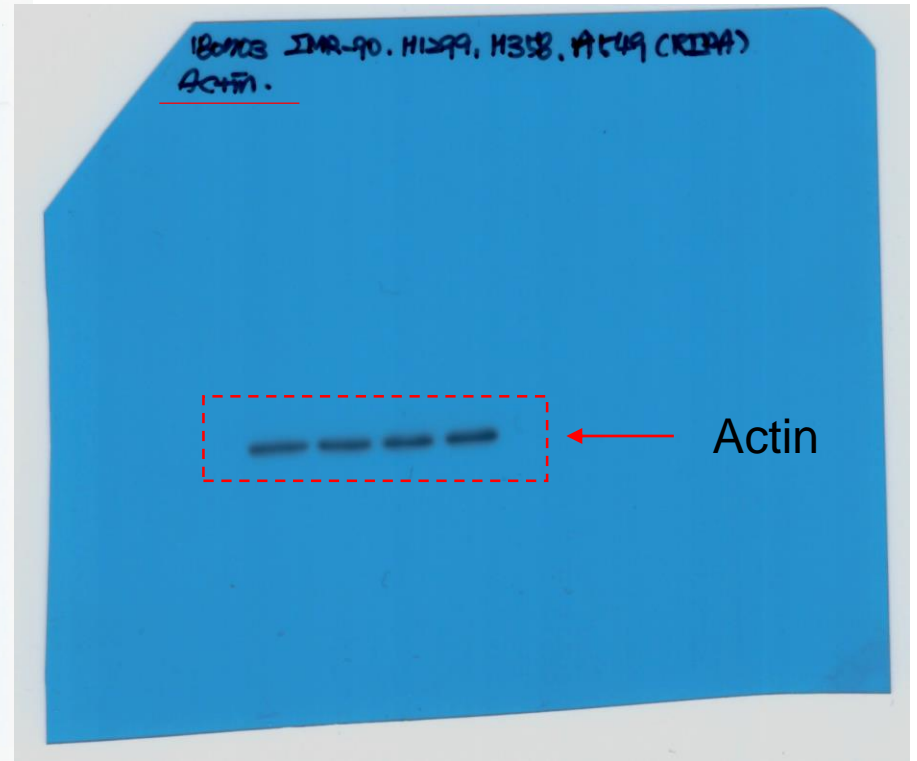

Figure 3C

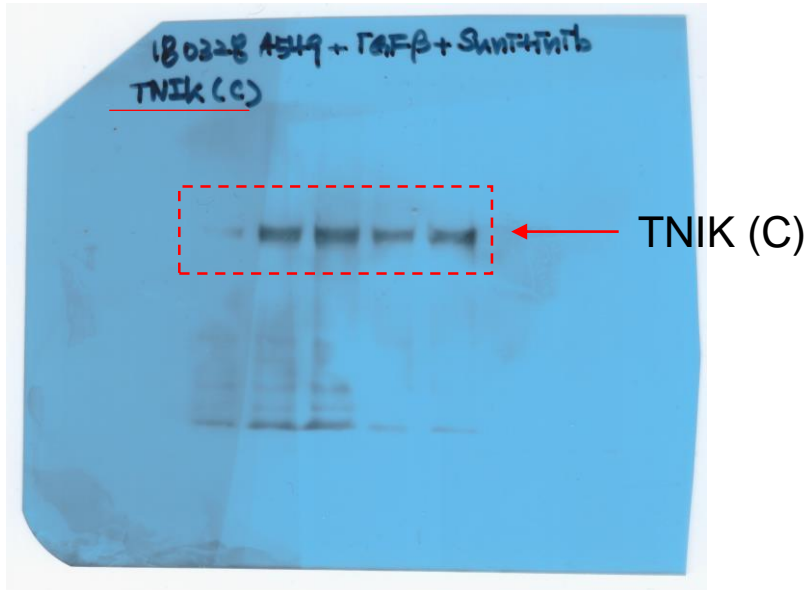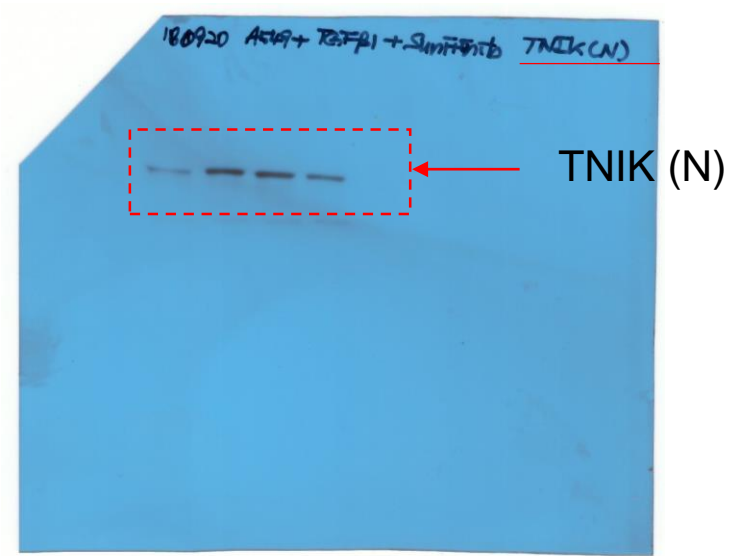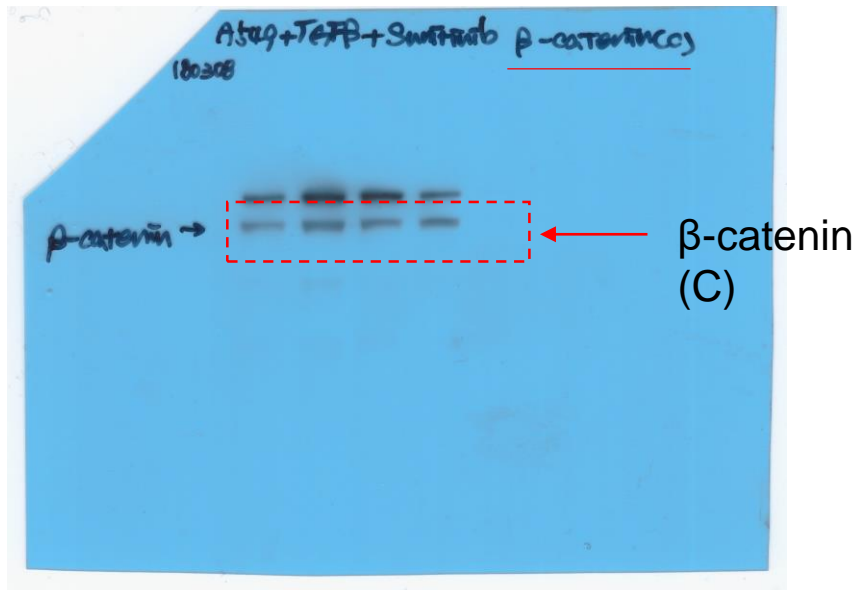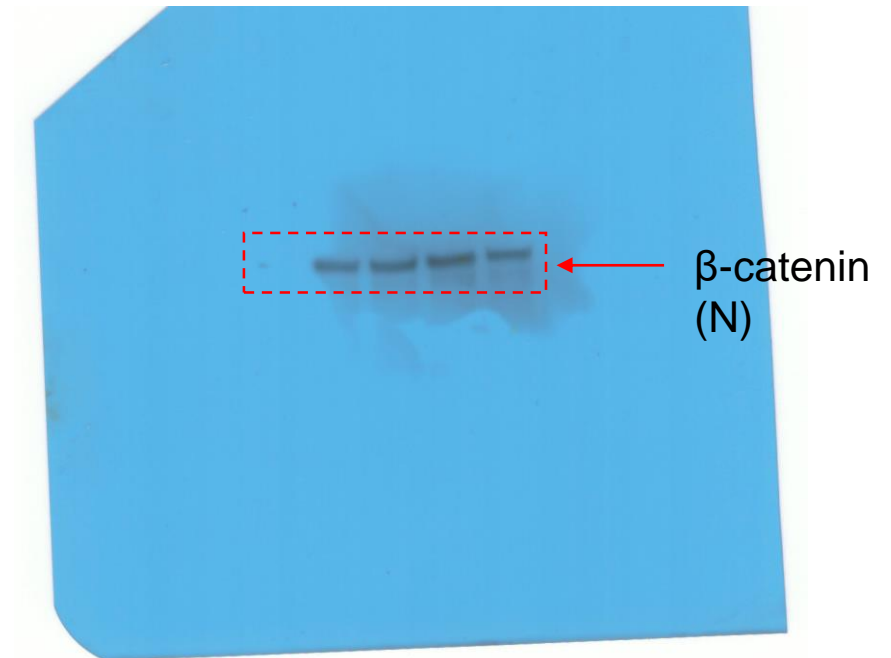

Figure 3C

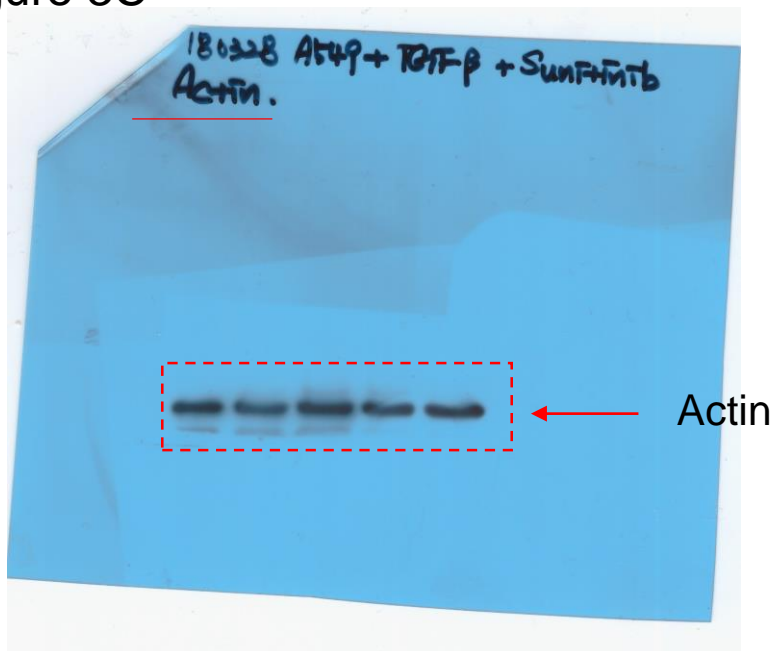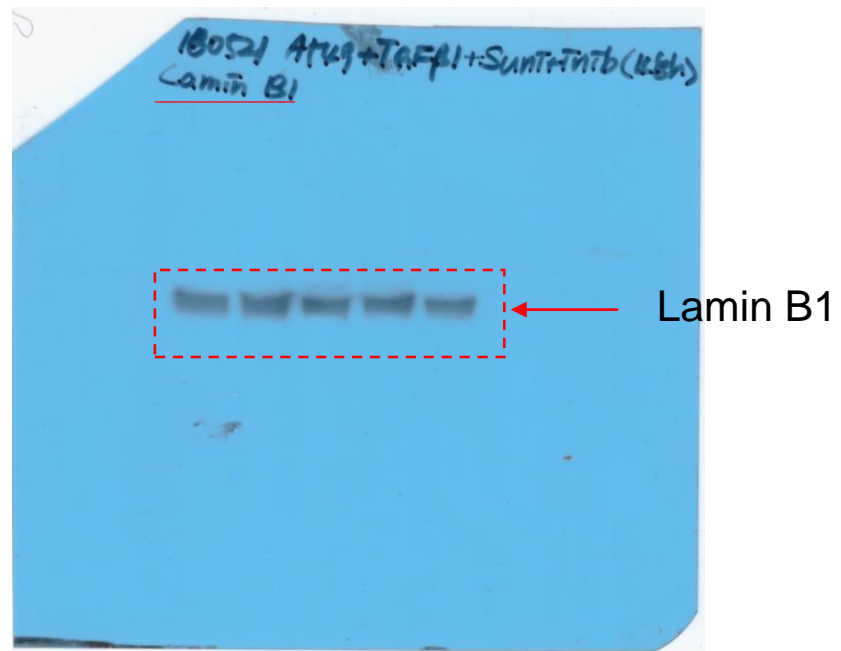

Figure 4A

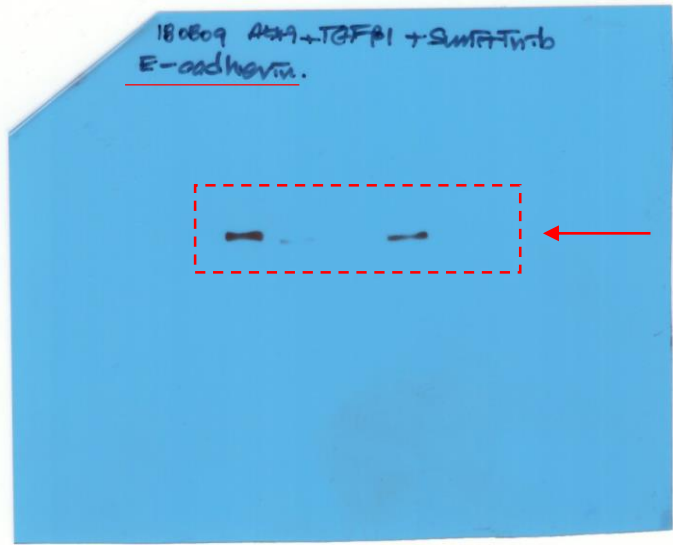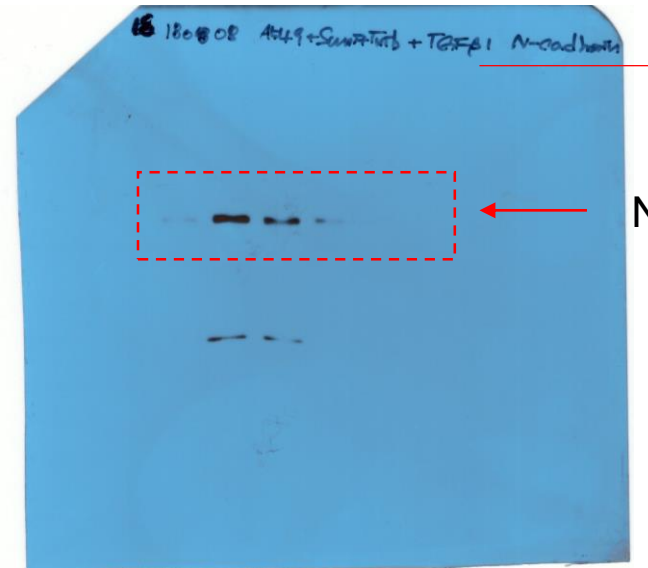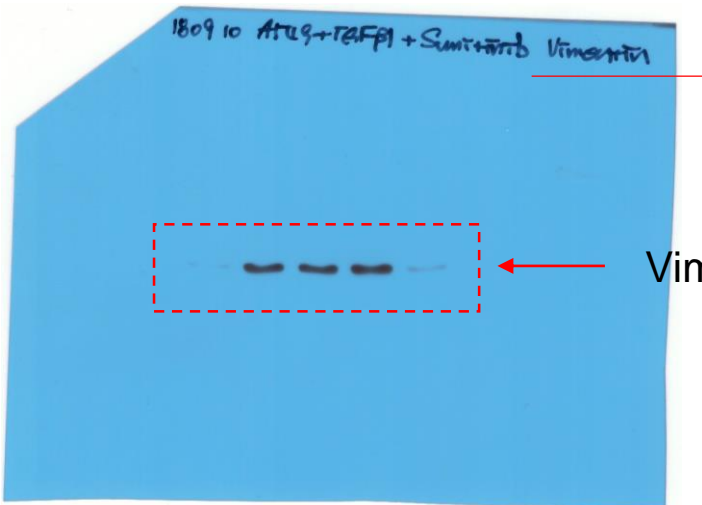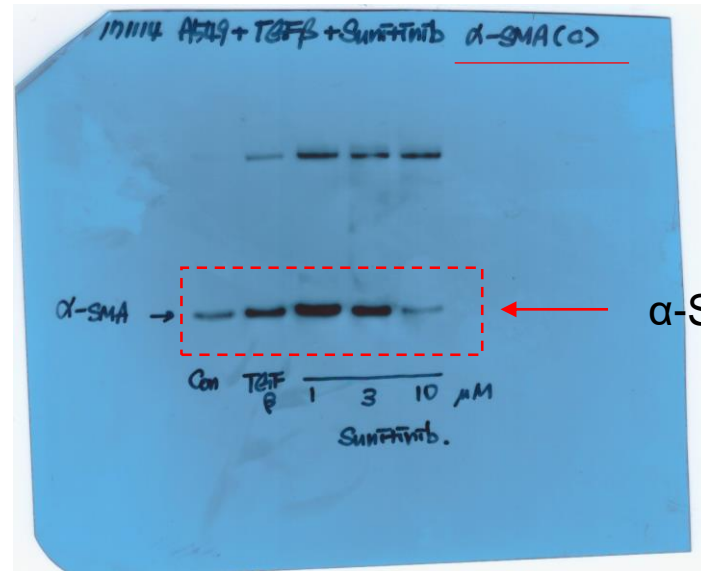

Figure 4A

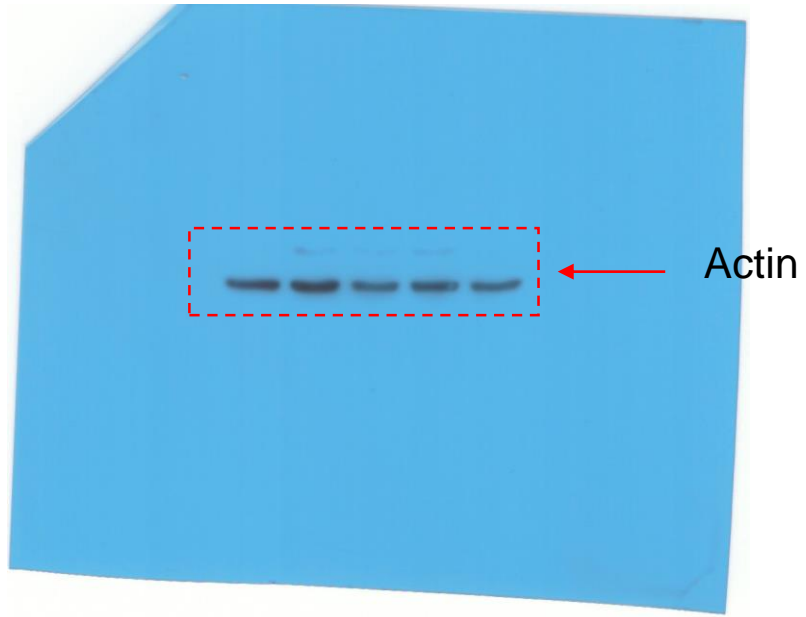

Figure 4D

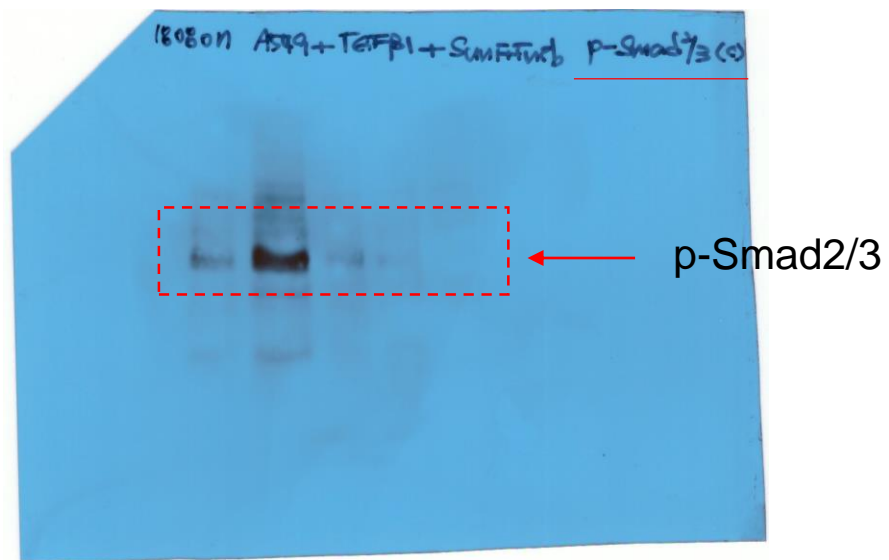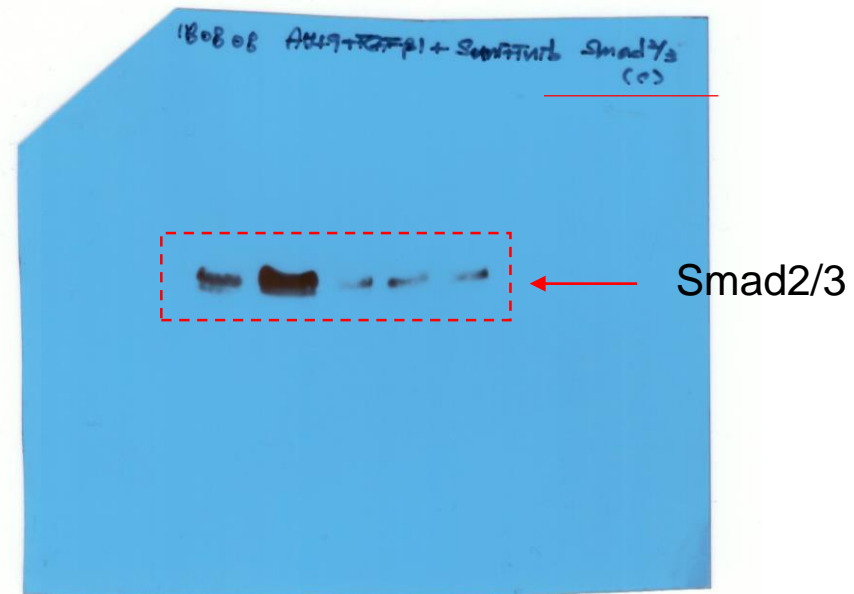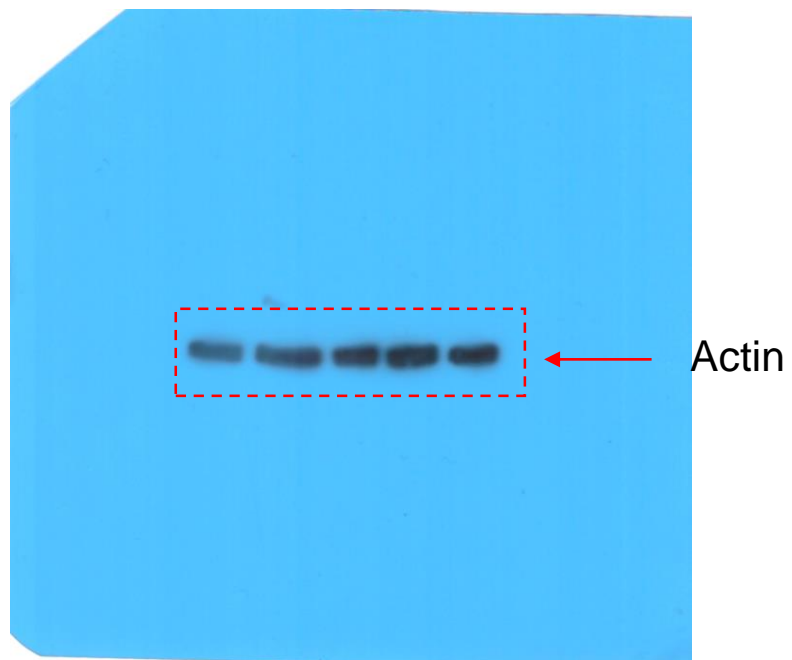

Figure 4G

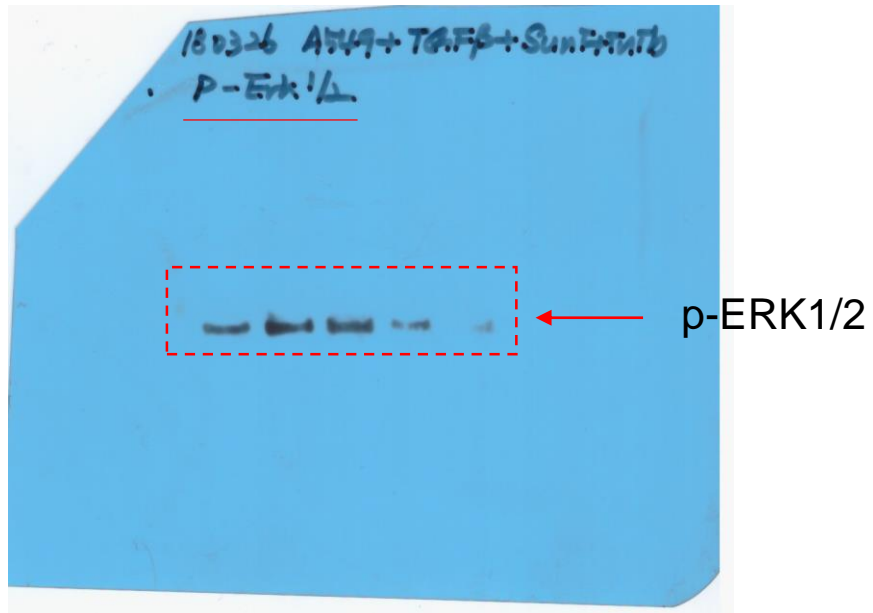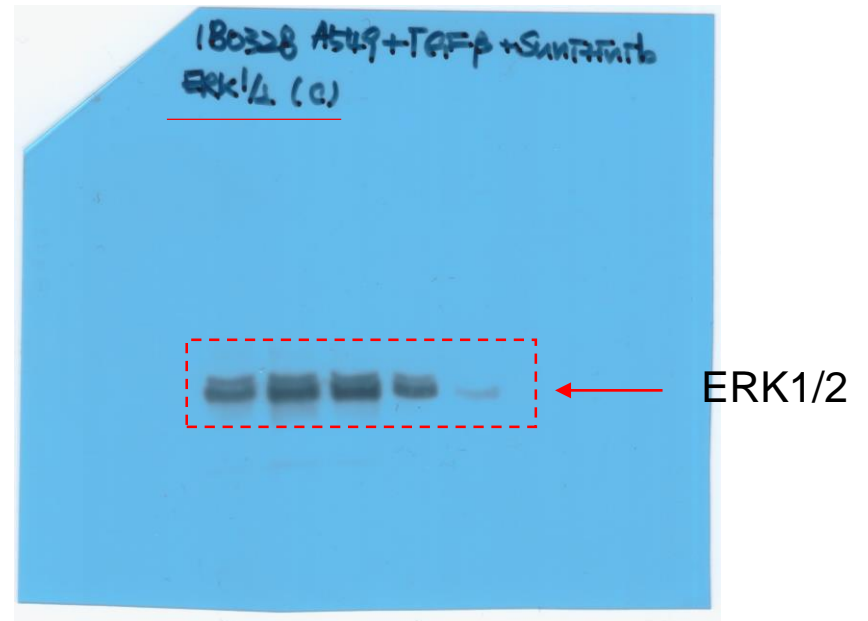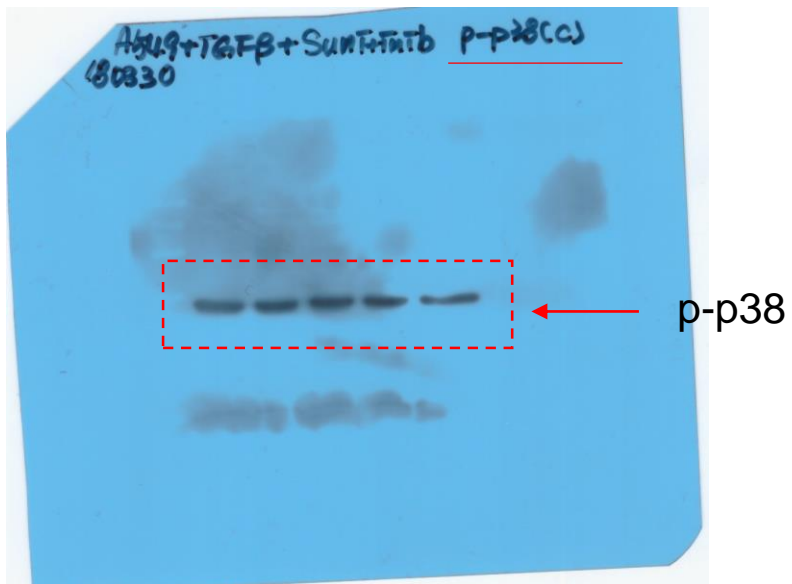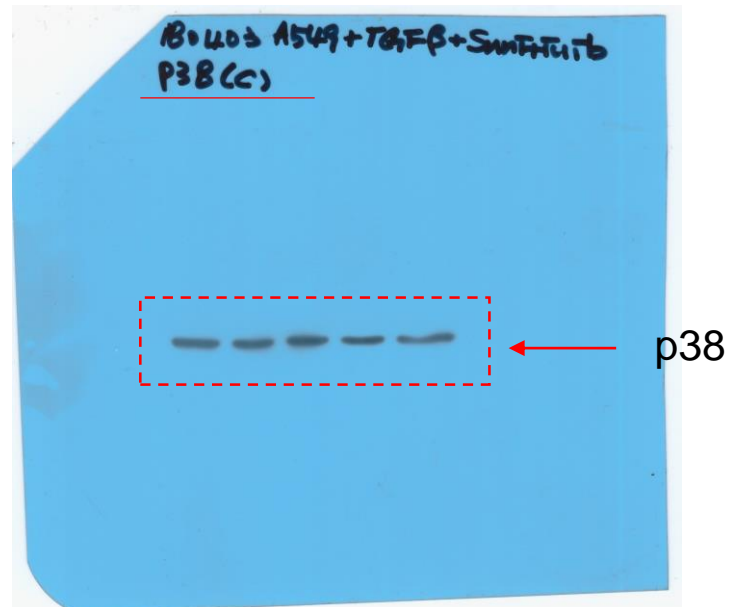

Figure 4G

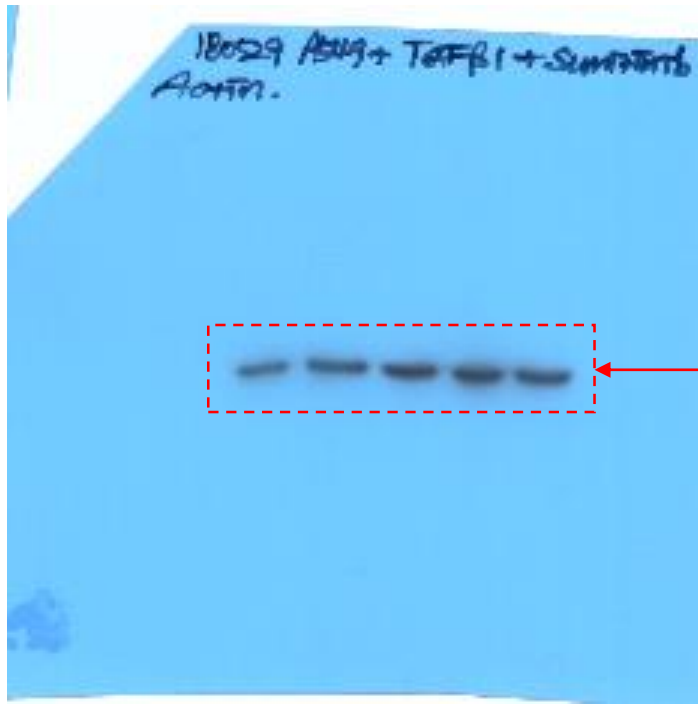

Actin



Figure 6A

1. control 2. TGF- $\beta$ 1 (5ng/ml) 3. TGF- $\beta$ 1 + cRGDFk 1 $\mu$ M 4. TGF- $\beta$ 1 + cRGDFk 3 $\mu$ M  
5. TGF- $\beta$ 1 + cRGDFk 10 $\mu$ M 6. TGF- $\beta$ 1 + cRGDFk 30 $\mu$ M

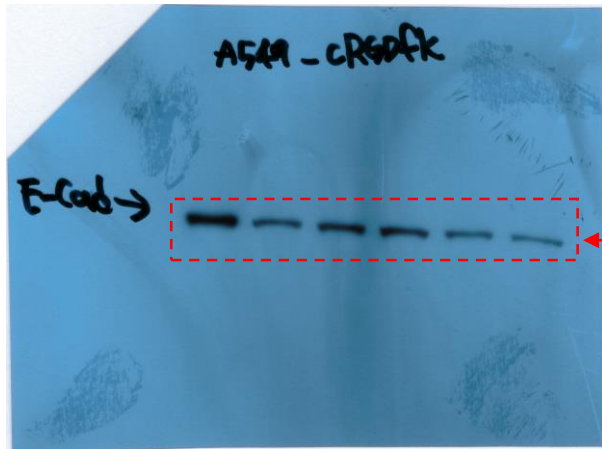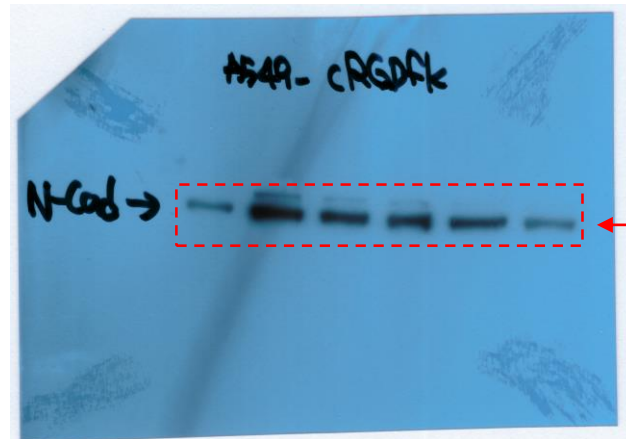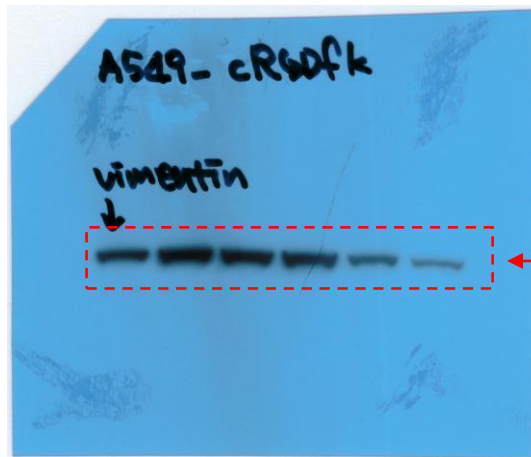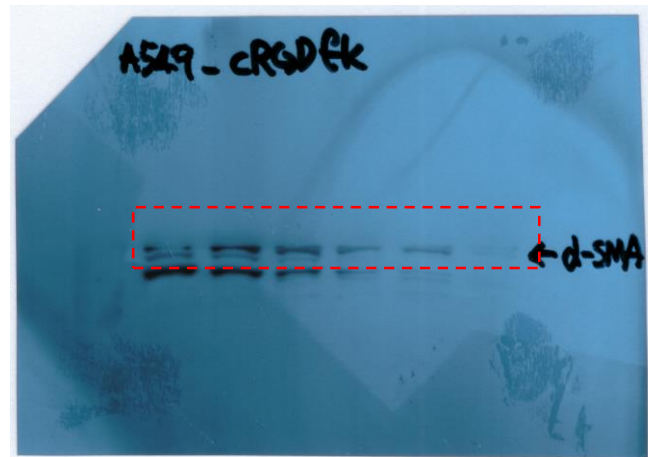

Figure 6A

1. control
2. TGF- $\beta$ 1 (5ng/ml)
3. TGF- $\beta$ 1 + cRGDFK 1 $\mu$ M
4. TGF- $\beta$ 1 + cRGDFK 3 $\mu$ M
5. TGF- $\beta$ 1 + cRGDFK 10 $\mu$ M
6. TGF- $\beta$ 1 + cRGDFK 30 $\mu$ M

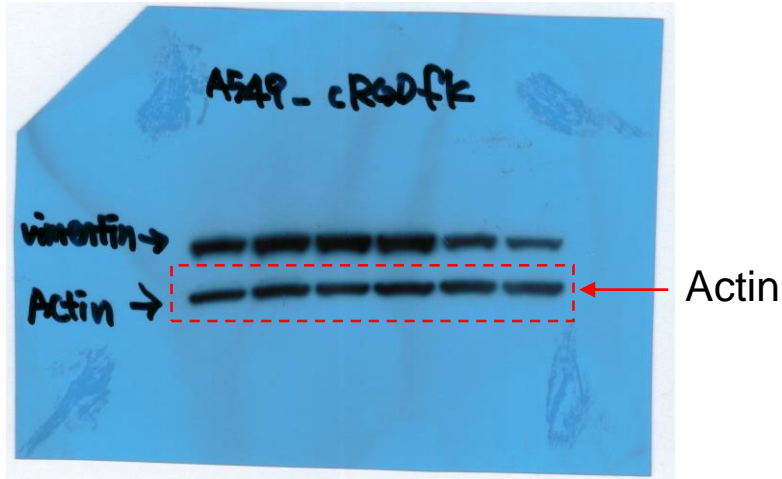

Figure 7B

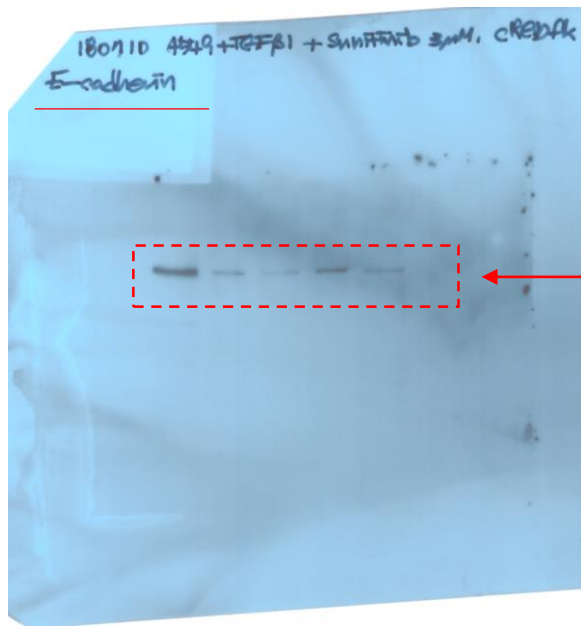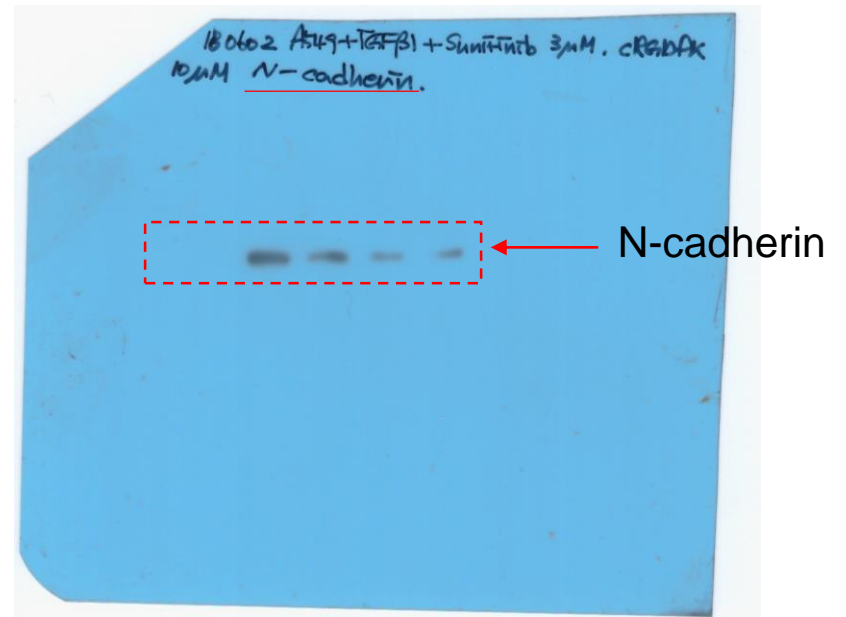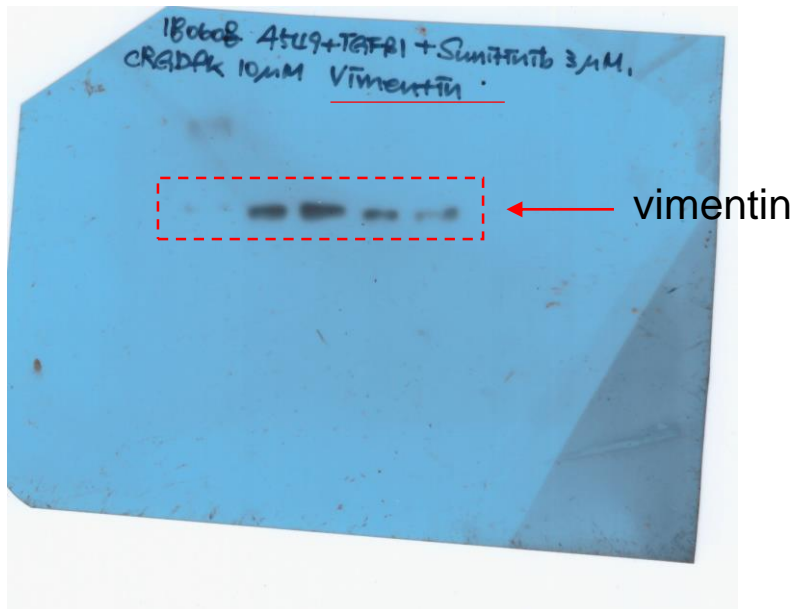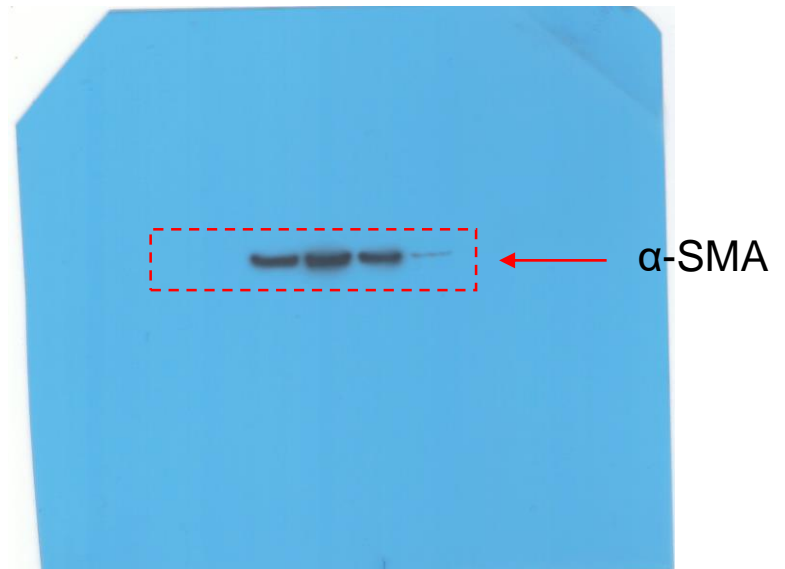

Figure 7B

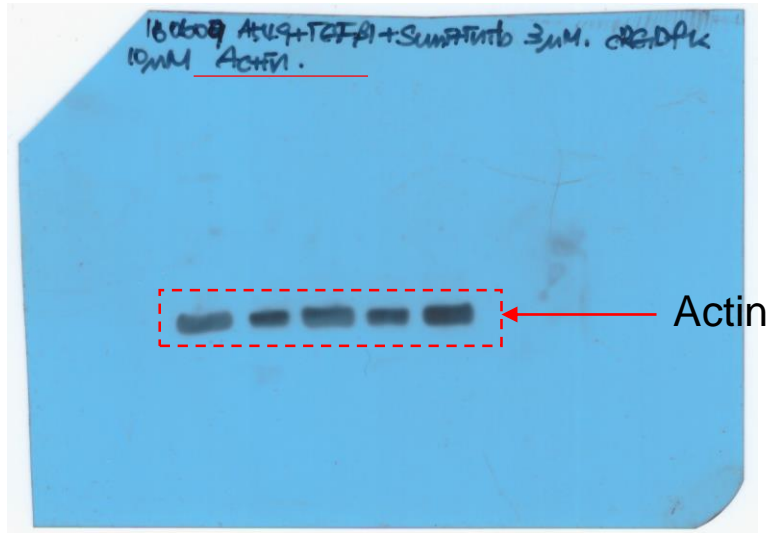

Supplement: pone.0232917.s011.pdf [file pone.0232917.s011.pdf]
