# Supplementary material for: Cyclic pentapeptide cRGDfK enhances the inhibitory effect of sunitinib on TGF-β1-induced epithelial-to-mesenchymal transition in human non-small cell lung cancer cells
Source: PubMed Central journal article supplement (PMC7433881; doi:10.1371/journal.pone.0232917), 2020-08-18
Supplement: pone.0232917.s009.pdf [file pone.0232917.s009.pdf]

**S1 Table. Primer sequences used in this study.**

| <b>Target gene</b> | <b>Forward (5' – 3')</b>     | <b>Reverse (5' – 3')</b>  |
|--------------------|------------------------------|---------------------------|
| <i>TCF4</i>        | GAGCAGCAAGTCCGAGAAAG         | ATGCTGAAACCTCTTGCGTC      |
| <i>CTNNB1</i>      | CCATCTTCCAGGAGCGAGAT         | CAGTGATGGCATGGACTGTG      |
| <i>TNIK</i>        | GCTATTGAGATCCGGTCAGT         | CAGGCTGCAACATTGAAAGA      |
| <i>c-MYC</i>       | AATGAAAAGGCCCCCAAGGTAGTTATCC | GTCGTTTCCGCAACAAGTCCTCTTC |
| <i>TWIST1</i>      | ATTCAGACCCTCAAGCTGGC         | GAGAGGGGAGGAAATCGAG       |
| <i>SNAI1</i>       | ACCTCCAGACCCACTCAGAT         | GCAGAGGACACAGAACCAGA      |
| <i>CDH1</i>        | TCCGAAGCTGCTAGTCTGAG         | CTCAAGGGAAGGGAGCTGAA      |
| <i>CDH2</i>        | CCCACAGCTCCACCATATGA         | TTCAGTCATCACCTCCACCA      |
| <i>VIM</i>         | CGCCAACTACATCGACAAGG         | GGCTTTGTCGTTGGTTAGCT      |
| <i>ITGAV</i>       | GCCGTGGATTTCTTCGTG           | GAGGACCTGCCCTCCTTC        |
| <i>ITGB3</i>       | CGCTAAATTTGAGGAAGAACG        | GAAGGTAGACGTGGCCTCTTT     |
| <i>GAPDH</i>       | GAGTCAACGGATTTGGTCGT         | GATCTCGCTCCTGGAAGATG      |
