# Supplementary material for: Cyclic pentapeptide cRGDfK enhances the inhibitory effect of sunitinib on TGF-β1-induced epithelial-to-mesenchymal transition in human non-small cell lung cancer cells
Source: PubMed Central journal article supplement (PMC7433881; doi:10.1371/journal.pone.0232917), 2020-08-18
Supplement: pone.0232917.s010.pdf [file pone.0232917.s010.pdf]

**S2 Table. Combination index (CI) values for the two-drug combination against cell viability of H358 and H1299 cells.**

| Cell line | Sunitinib ( $\mu\text{M}$ ) | cRGDfK ( $\mu\text{M}$ ) | CI value |
|-----------|-----------------------------|--------------------------|----------|
| H358      | 0.3                         | 0.3                      | 0.7788   |
|           | 1                           | 1                        | 0.6901   |
|           | 3                           | 3                        | 0.4683   |
|           | 10                          | 10                       | 0.6667   |
|           | 30                          | 30                       | 0.6243   |
| H1299     | 0.3                         | 0.3                      | 0.3180   |
|           | 1                           | 1                        | 0.2130   |
|           | 3                           | 3                        | 0.1646   |
|           | 10                          | 10                       | 0.1051   |
|           | 30                          | 30                       | 0.1306   |
